# Supplementary material for: Shedding light on conditions for the successful passive dissemination of recommendations in primary care: a mixed methods study
Source: Springer Nature journal article supplement (doi:10.1186/s13012-018-0822-x), 2018-10-16
Supplement: MOESM2 [file 16204104]

|                                  |                                                                                                                                                                                                                                                                                                                                                                                                                                                                                                                                                                                                                                                                                                      |                                                                                                                                                                                                                                                                                                                                                   |                                                                                                                                                                                                                                        |                                                                                                                                                                                                                                                                                                                                                                                                                                                                                                         |                                                                                                                                                                                                                                                                                                                                                                                                                                                                                                                                                  |
|----------------------------------|------------------------------------------------------------------------------------------------------------------------------------------------------------------------------------------------------------------------------------------------------------------------------------------------------------------------------------------------------------------------------------------------------------------------------------------------------------------------------------------------------------------------------------------------------------------------------------------------------------------------------------------------------------------------------------------------------|---------------------------------------------------------------------------------------------------------------------------------------------------------------------------------------------------------------------------------------------------------------------------------------------------------------------------------------------------|----------------------------------------------------------------------------------------------------------------------------------------------------------------------------------------------------------------------------------------|---------------------------------------------------------------------------------------------------------------------------------------------------------------------------------------------------------------------------------------------------------------------------------------------------------------------------------------------------------------------------------------------------------------------------------------------------------------------------------------------------------|--------------------------------------------------------------------------------------------------------------------------------------------------------------------------------------------------------------------------------------------------------------------------------------------------------------------------------------------------------------------------------------------------------------------------------------------------------------------------------------------------------------------------------------------------|
| Key components                   | <b>Reinforce Family Medicine Group (FMG) capacity and competency</b>                                                                                                                                                                                                                                                                                                                                                                                                                                                                                                                                                                                                                                 | <b>Management of patients living with dementia in FMG</b><br>Collaboration family physician-case manager                                                                                                                                                                                                                                          |                                                                                                                                                                                                                                        |                                                                                                                                                                                                                                                                                                                                                                                                                                                                                                         | <b>Pertinent referrals to memory clinics, BPSD team, homecare services, caregivers support</b>                                                                                                                                                                                                                                                                                                                                                                                                                                                   |
|                                  |                                                                                                                                                                                                                                                                                                                                                                                                                                                                                                                                                                                                                                                                                                      | <b>Identification of patients</b>                                                                                                                                                                                                                                                                                                                 | <b>Treatment</b>                                                                                                                                                                                                                       | <b>Follow-up</b>                                                                                                                                                                                                                                                                                                                                                                                                                                                                                        |                                                                                                                                                                                                                                                                                                                                                                                                                                                                                                                                                  |
| Bergman report's recommendations | <p>Training in FMG</p> <p>Additional resources and role definition of case manager (pivot nurse) – resources utilisation</p> <p>Adapted clinical tools and practice guides to the FMG context</p>                                                                                                                                                                                                                                                                                                                                                                                                                                                                                                    | <p>Identification and evaluation of cognitive disorders by family physician or case manager</p> <p>Dementia diagnosis</p> <p>Explanation of diagnosis to patient and caregiver</p>                                                                                                                                                                | <p>Prescription of dementia medications when appropriate</p> <p>Evaluation of patients and caregivers needs</p> <p>Education and implication of patients and caregivers</p>                                                            | <p>Proactive follow-up of patients and caregivers</p> <p>Easy access to a clinician for patients and caregiver</p> <p>Regular assessments by the family physician or case manager of cognition, functional status, behavioral and psychological symptoms of dementia (BPSD), driving, dementia medication, weight, and homecare services and community services' needs</p> <p>No anticholinergic prescriptions</p> <p>Assessment of caregiver needs</p> <p>Coordination of services by case manager</p> | <p>Agreement between FMG and other services</p> <p>Collaboration between all health services</p> <p>Use of criteria for referrals</p> <p>Shared Clinical Information System</p> <p>Shared information</p> <p>Homecare services – caregiver support: rapid referrals of patients and sufficient resources</p> <p>Memory clinic – BPSD team: appropriate referrals and evaluation within 3 months (1 month for BPSD team)</p> <p>Access to laboratory tests, CT scans within 1 month</p> <p>Improve transition between home and long term care</p> |
| Outputs                          | <p><i>Not evaluated</i></p> <ul style="list-style-type: none"> <li>• Training received</li> <li>• Knowledge, attitude and practice of FMG clinicians</li> <li>• Elaboration and systematic use of practice guides and clinical tools in FMG</li> <li>• Allocated time by additional resources in FMG versus other populations</li> </ul>                                                                                                                                                                                                                                                                                                                                                             | <ul style="list-style-type: none"> <li>• Number of diagnosed patients and type of dementia or cognitive impairment</li> </ul> <p><i>Not evaluated</i></p> <ul style="list-style-type: none"> <li>• Number of identified patients</li> <li>• Number of patients evaluated</li> <li>• Patients and caregivers' education and information</li> </ul> | <p><i>Not evaluated:</i></p> <ul style="list-style-type: none"> <li>• Number of patients for whom the FMG initiated the treatment</li> <li>• Evaluation of patients' needs</li> <li>• Experience of patients and caregivers</li> </ul> | <ul style="list-style-type: none"> <li>• Quality of Follow-up</li> </ul> <p><i>Not evaluated</i></p> <ul style="list-style-type: none"> <li>• Number of contacts or visits between patients or their family and the family physician or case manager</li> <li>• Role of the case manager in care coordination</li> </ul>                                                                                                                                                                                | <p><i>Not evaluated:</i></p> <ul style="list-style-type: none"> <li>• Number of referrals, motives and content</li> <li>• Time between referral and evaluation by homecare services</li> <li>• Time between referral and evaluation by memory clinic (&lt;3 months)</li> <li>• Time between referral and evaluation by BPSD team (&lt;1 month)</li> <li>• Report sent back to FMG</li> <li>• Number of patients admitted to long term care</li> </ul>                                                                                            |
| Short term results               | <p><b>Improve identification and diagnosis of patient with cognitive impairment by the FMG</b></p> <p><b>Improve the quality of the management by FMG</b></p> <p><i>Not evaluated:</i></p> <p>Improve knowledge, attitude and practice of all FMG clinicians</p> <p>Decrease delays for memory clinic, BPSD teams, home-based services, CT scans</p> <p>Decrease non pertinent referrals and increase pertinent referrals to memory clinic</p> <p>Increase clinicians' satisfaction</p> <p>Increase patients and caregivers' satisfaction and experience</p> <p><u>Unexpected results: overcrowding of home-based services and memory clinic; decrease access to programs for other diseases</u></p> |                                                                                                                                                                                                                                                                                                                                                   |                                                                                                                                                                                                                                        |                                                                                                                                                                                                                                                                                                                                                                                                                                                                                                         |                                                                                                                                                                                                                                                                                                                                                                                                                                                                                                                                                  |
| Long term results                | <p><i>Not evaluated:</i></p> <p>Maintain patients' functional status and quality of life</p> <p>Decrease burden and improve the quality of life of caregivers</p> <p>Decrease inappropriate service uses and costs</p> <p>Maintain patients at home</p>                                                                                                                                                                                                                                                                                                                                                                                                                                              |                                                                                                                                                                                                                                                                                                                                                   |                                                                                                                                                                                                                                        |                                                                                                                                                                                                                                                                                                                                                                                                                                                                                                         |                                                                                                                                                                                                                                                                                                                                                                                                                                                                                                                                                  |
